# Supplementary material for: Hydro-climatic changes of wetlandscapes across the world
Source: PubMed Central journal article supplement (PMC7854620; doi:10.1038/s41598-021-81137-3), 2021-02-02
Supplement: 41598_2021_81137_MOESM1_ESM.pdf [file 41598_2021_81137_MOESM1_ESM.pdf]

# Hydro-climatic changes of wetlandscapes across the world

## Authors

I. Åhlén<sup>1\*</sup>, G. Vigouroux<sup>1</sup>, G. Destouni<sup>1</sup>, J. Pietroni<sup>1,2</sup>, N. Ghajarnia<sup>1</sup>, J. Anaya<sup>3</sup>, J. Blanco<sup>4</sup>, S. Borja<sup>1</sup>, S. Chalov<sup>5</sup>, K.P. Chun<sup>6</sup>, N. Clerici<sup>7</sup>, A. Desormeaux<sup>8</sup>, P. Girard<sup>9</sup>, O. Gorelits<sup>10</sup>, A. Hansen<sup>11</sup>, F. Jaramillo<sup>1,12</sup>, Z. Kalantari<sup>1</sup>, A. Labbaci<sup>13</sup>, L. Licero-Villanueva<sup>14</sup>, J. Livsey<sup>1</sup>, G. Maneas<sup>1,15</sup>, K.L. McCurley Pisarello<sup>16</sup>, D. Moshir Pahani<sup>1</sup>, S. Palomino-Ángel<sup>3, 17</sup>, R. Price<sup>18</sup>, C. Ricaurte-Villota<sup>19</sup>, L. Fernanda Ricaurte<sup>20</sup>, V.H Rivera-Monroy<sup>21</sup>, A. Rodriguez<sup>19</sup>, E. Rodriguez<sup>22</sup>, J. Salgado<sup>23,24</sup>, B. Sannel<sup>1</sup>, S. Seifollahi-Aghmiuni<sup>1</sup>, M. Simard<sup>25</sup>, Y. Sjöberg<sup>26</sup>, P. Terskii<sup>5</sup>, J. Thorslund<sup>1,27</sup>, D.A. Zamora<sup>22</sup>, J. Jarsjö<sup>1</sup>

<sup>1</sup>Department of Physical Geography and Bolin Center for Climate Research, Stockholm University, 10691, Stockholm, Sweden

<sup>2</sup> WSP Sverige AB, Ullevigatan 19, 411 40 Gothenburg, Sweden

<sup>3</sup> Facultad de Ingeniería, Universidad de Medellín, Carrera 87 30–65, Medellín 050026, Colombia

<sup>4</sup> Instituto de Biología, Facultad de Ciencias Exactas y Naturales, Universidad de Antioquia, Calle 70 No. 52-21, Medellín 050010, Colombia

<sup>5</sup> Faculty of Geography, Lomonosov Moscow State University, Moscow 119991, Russia

<sup>6</sup> Department of Geography, Hong Kong Baptist University, Hong Kong SAR, China

<sup>7</sup> Department of Biology, Faculty of Natural Sciences and Mathematics, Universidad del Rosario, Bogotá 13409, DC, Colombia

<sup>8</sup> School of Natural Resources and Environment, University of Florida, Gainesville, Florida 32603, USA

<sup>9</sup> Centro de Pesquisa do Pantanal and BioScience Institute, Federal University of Mato Grosso, Cuiabá, Mato Grosso, Brazil

<sup>10</sup> Zubov State Oceanographic Institute, Moscow 119034, Russia

<sup>11</sup> Department of Civil, Environmental and Architectural Engineering, University of Kansas, Lawrence, Kansas 66045, USA

<sup>12</sup> Baltic Sea Centre, 10691, Stockholm, Sweden

<sup>13</sup> Department of Geology, Faculty of Sciences, Ibn Zohr University, Agadir, Morocco

<sup>14</sup> Institute of Botany and Landscape Ecology, University of Greifswald, Greifswald 17489, Germany

<sup>15</sup> Navarino Environmental Observatory, 24 001 Messinia, Greece

<sup>16</sup> Department of Soil and Water Sciences, University of Florida, Gainesville, Florida 32611, USA

<sup>17</sup> Facultad de Ingeniería, Universidad de San Buenaventura, Carrera 56C N° 51-110, Medellín 050010, Colombia

<sup>18</sup> Department of Earth and Environment, Southeast Environmental Research Center, Florida International University, Miami, Florida 33199, USA

<sup>19</sup> Instituto de investigaciones marinas y costeras de Colombia “José Benito Vives de Andreis”—INVEMAR, 470006 Santa Marta, Colombia

<sup>20</sup> Alexander von Humboldt Biological Resources Research Institute, Calle 28 A No. 15-09, Bogotá, D.C., Colombia

<sup>21</sup> Department of Oceanography and Coastal Sciences, College of the Coast and Environment, Louisiana State University, Baton Rouge, Louisiana 70803, USA

<sup>22</sup> Civil and Agricultural Engineering Department, Universidad Nacional de Colombia, Bogotá 11001, Colombia

<sup>23</sup> Departamento de Ciencias Biológicas, Universidad de Los Andes, Cra. 1 No. 18A-12, Bogotá 111711, Colombia

<sup>24</sup> Facultad de Ingeniería, Universidad Católica de Colombia, Av. Caracas No. 46-72, Bogotá 111311, Colombia

<sup>25</sup> Jet Propulsion Laboratory, California Institute of Technology, Pasadena, California, USA

<sup>26</sup> Department of Geosciences and Natural Resource Management, University of Copenhagen, Denmark

<sup>27</sup> Hydrology, Water resources, and Permafrost at the department, and at Utrecht University

\* Corresponding author: [imenne.ahlen@natgeo.su.se](mailto:imenne.ahlen@natgeo.su.se)

52  
53 **Supplementary Materials**

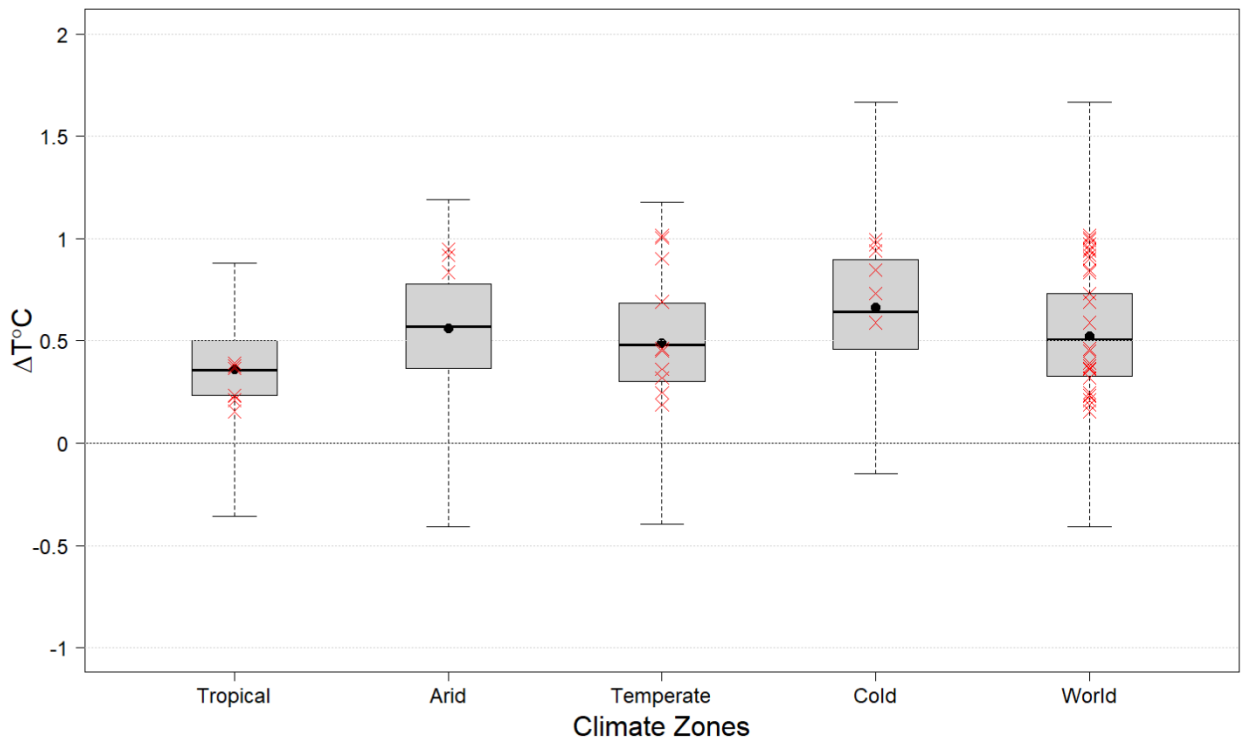

92 **Fig. S1. Change in temperature  $\Delta T^{\circ}\text{C}$ .** Boxplots showing  $\Delta T^{\circ}\text{C}$  for each climate zone and wetlandscape  
93 between the period of 1976-1995 and 1996-2015 the mean  $\Delta T^{\circ}\text{C}$  for the climate zones are shown as black  
94 points and as red crosses for the wetlandscapes.  
95

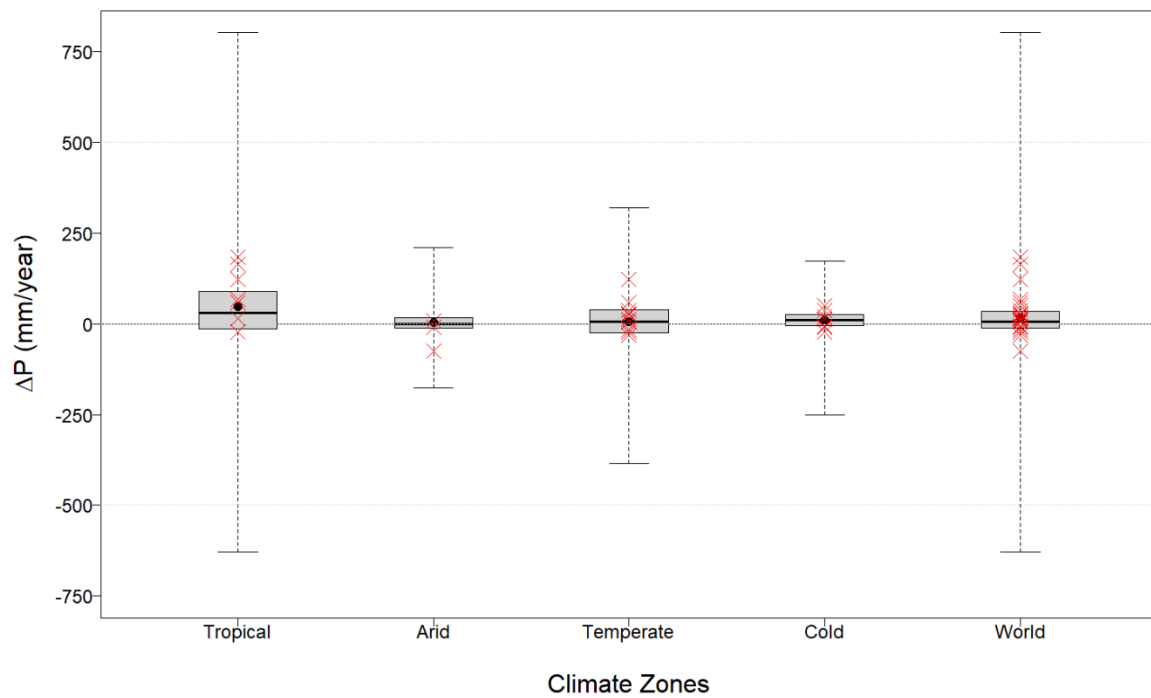

**Fig. S2. Change in precipitation  $\Delta P$  (mm/year).** Boxplot showing the  $\Delta P$  for each climate zone and wetlandscape between the period of 1976-1995 and 1996-2015. Mean  $\Delta P$  for the climate zones are shown as white points and as red crosses for the wetlandscapes

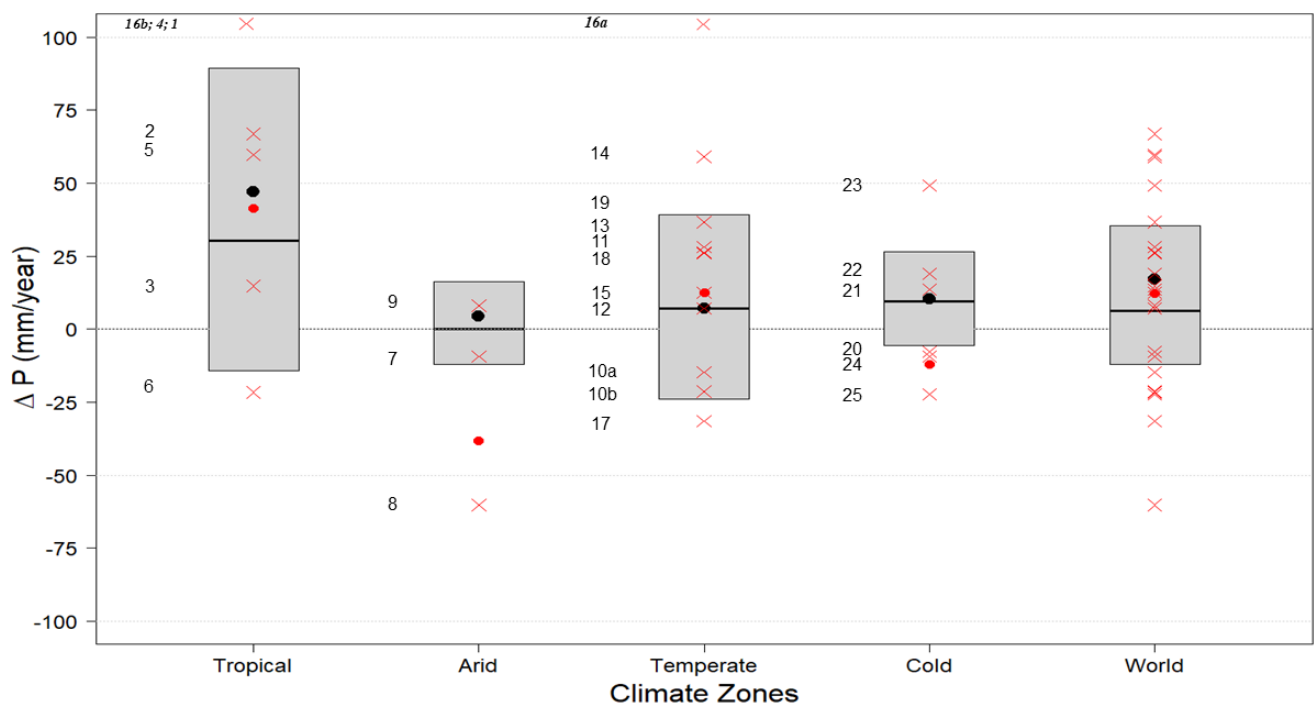

103 **Fig. S3. Change in precipitation  $\Delta P$  (mm/year).** Boxplot showing  $\Delta P$  (mm/years) for each climate zone for the period between 1976-1995 and 1996-2015. The  $\Delta P$  for each wetlandscape is presented as red crosses with a corresponding number relating to the name of the wetlandscape (see Table 1). Mean  $\Delta P$  (mm/years) for the climate zones are shown as black points, while the red points show the mean  $\Delta P$  (mm/years) for the wetlandscapes.

104

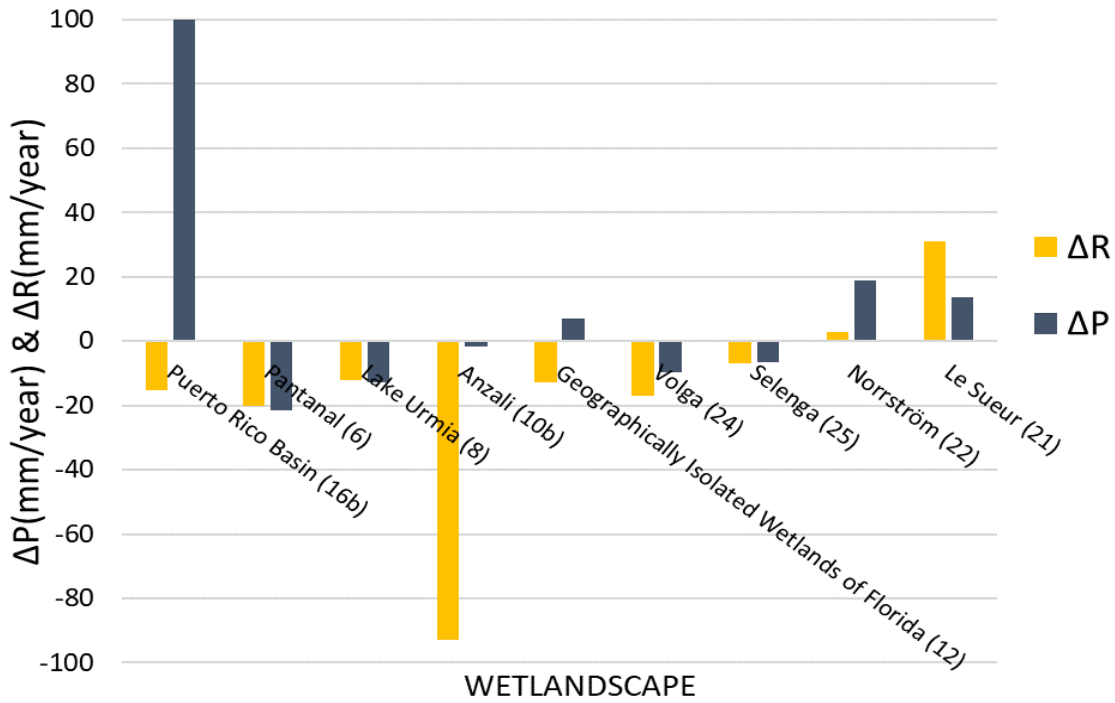

105

**Fig. S4.** Change in precipitation and runoff for the wetlandscapes with available discharge data. The studied time period of change in precipitation and discharge are sometime differing between the wetlandscapes. This information can be read in Table 1 (found in manuscript).

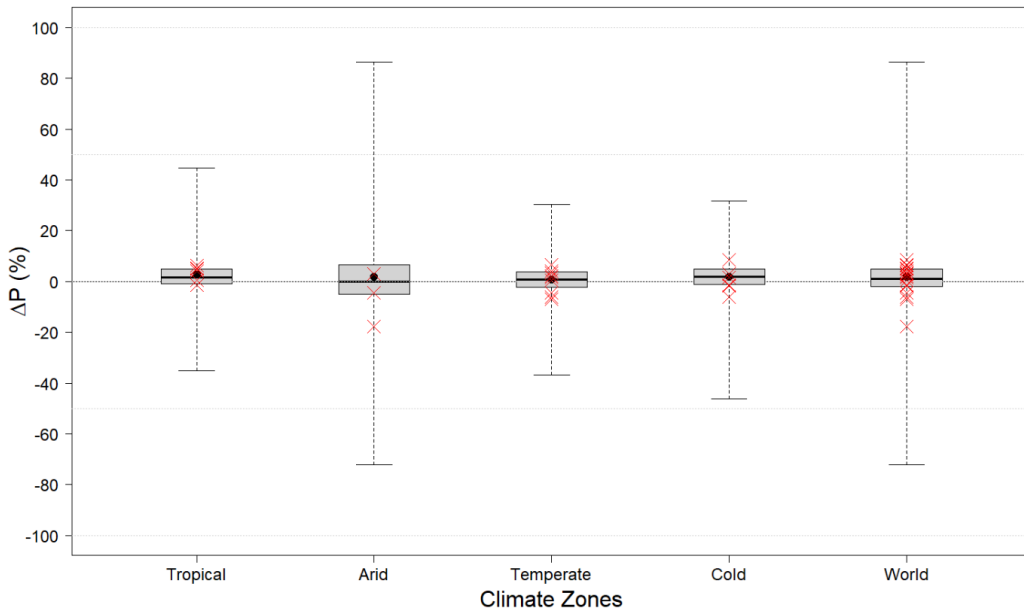

106

107

108

109

**Fig. S5.** Relative change in precipitation  $\Delta P\%$ . Boxplot showing  $\Delta P\%$  for each climate zone and wetlandscapes between the period of 1976-1995 and 1996-2015. Mean  $\Delta P\%$  for the climate zones are shown as white points and as red crosses for the wetlandscapes.

110  
111

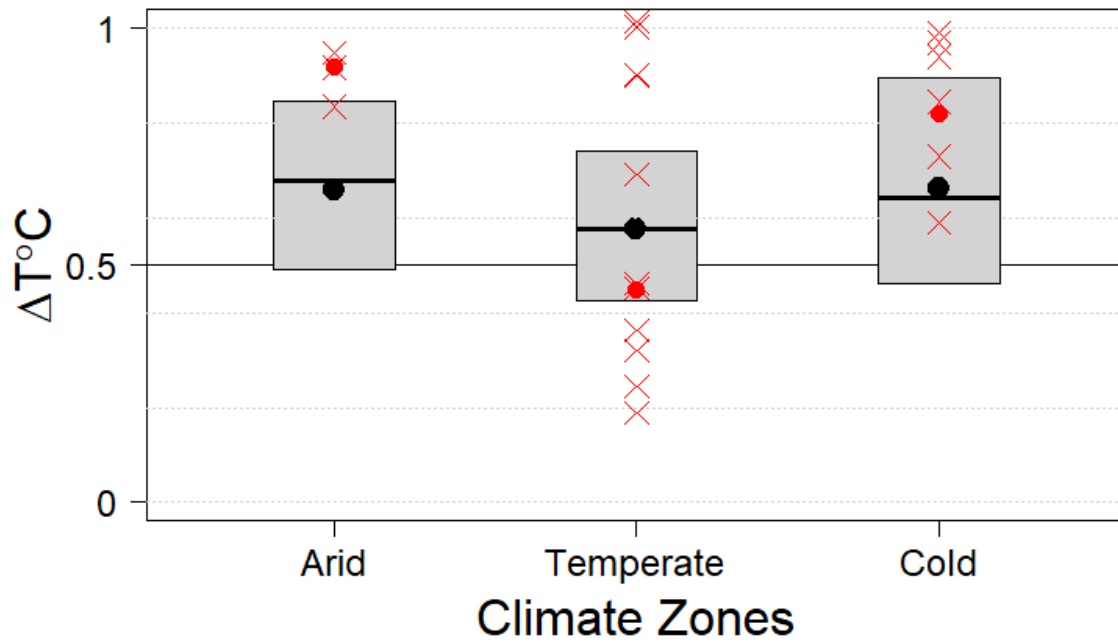

112  
113 **Fig. S6. Change in temperature ( $\Delta T^{\circ}\text{C}$ ) for climate zone located in the north hemisphere.** Boxplot  
114 (without whisker) showing the  $\Delta T^{\circ}\text{C}$  for climate zone located in the north hemisphere between the periods  
115 of 1976-1995 and 1996-2015. The  $\Delta T^{\circ}\text{C}$  for each wetlandscape is shown as red crosses. Mean  $\Delta T^{\circ}\text{C}$  for  
116 the climate zones are shown as black points, while the red points show the mean  $\Delta T^{\circ}\text{C}$  for the  
117 wetlandscapes.

118  
119  
120  
121  
122  
123

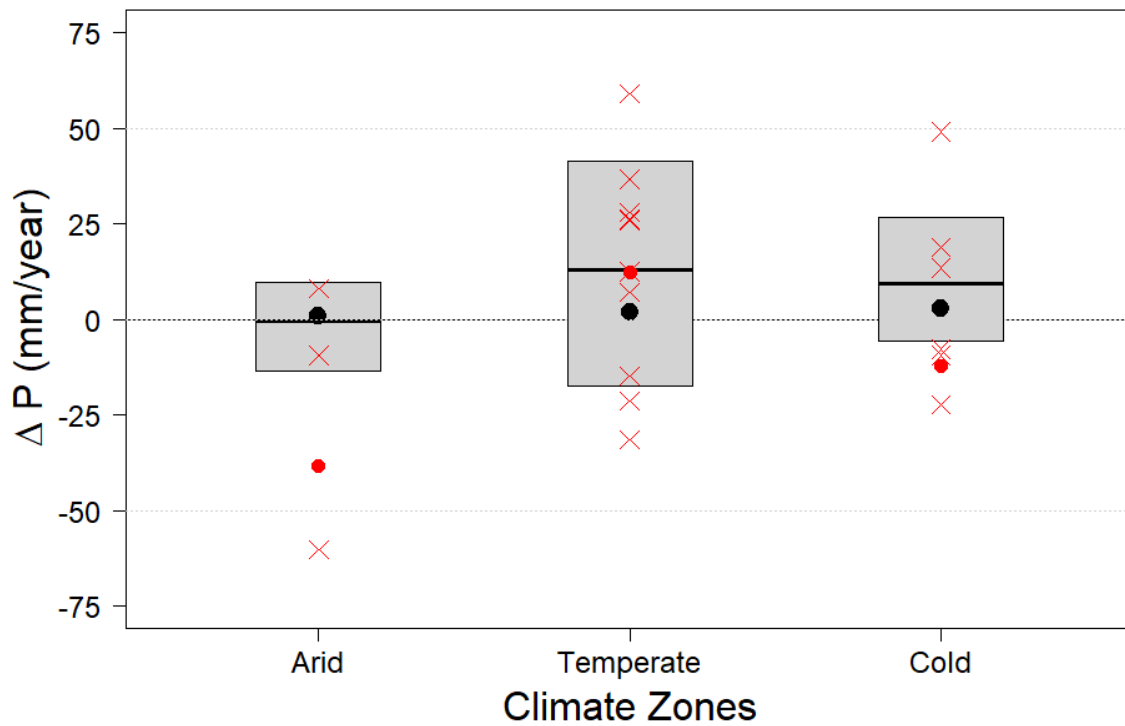

124  
 125 **Fig. S7. Change in precipitation  $\Delta P$  (mm/year) of climate zones located in the north hemisphere.**  
 126 *Boxplot showing  $\Delta P$  (mm/years) for each climate zone located in the north hemisphere for the period*  
 127 *between 1976-1995 and 1996-2015. The  $\Delta P$  for each wetlandscape is presented as red crosses. Mean  $\Delta P$*   
 128 *(mm/years) for the climate zones are shown as black points, while the red points show the mean  $\Delta P$*   
 129 *(mm/years) for the wetlandscapes.*

130

131

132

133

134

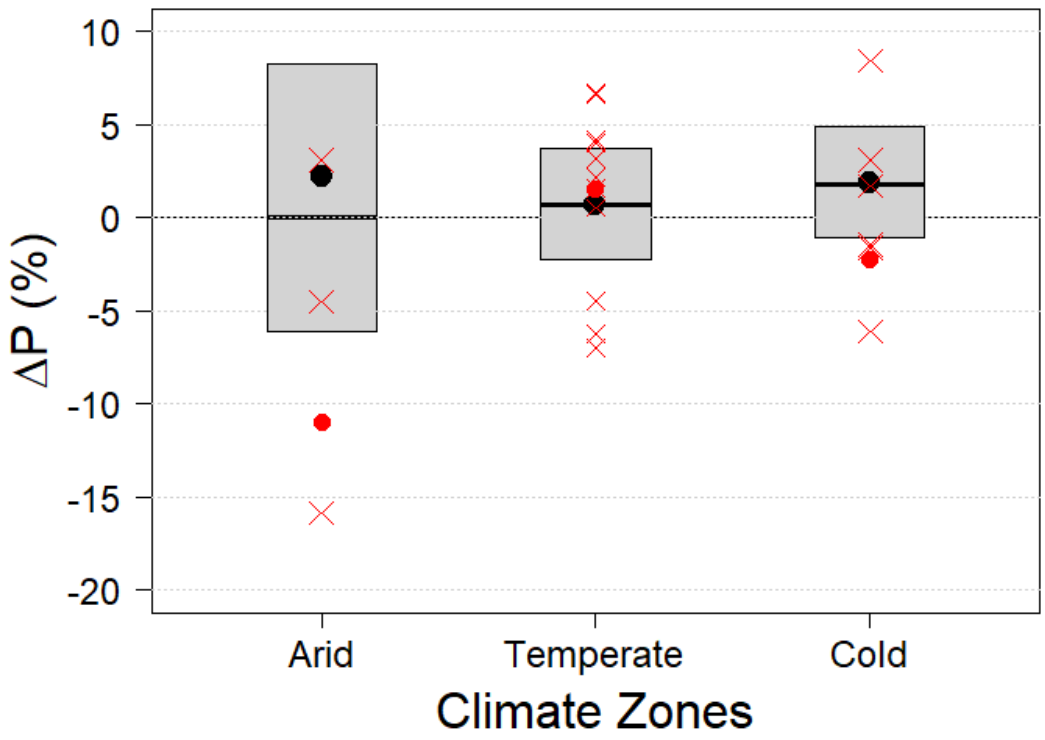

135  
136

137 **Fig. S8. Relative change in precipitation ( $\Delta P\%$ ) of climate zones located in the north hemisphere.**  
 138 *Boxplots show the relative  $\Delta P$  in percent for each climate zone located in the north hemisphere for the*  
 139 *periods between 1976-1995 and 1996-2015. The relative  $\Delta P$  for each wetlandscape is presented as red*  
 140 *crosses. Mean  $\Delta P\%$  for the climate zones are shown as black points, while the red points show the mean*  
 141  *$\Delta P\%$  for the wetlandscapes. For detailed boxplots with whiskers, see supplementary material.*

142  
143  
144

145 **Table S1. Characteristics of the wetlandscapes.** Table showing the characteristics of the wetlandscapes  
 146 in terms of wetland type and wetland area coverage of the wetlandscapes.

| ID | Site name                           | Country  | Wetland type                                                                 | Area of wetlands relative to total catchment/wetland scape area (%) |
|----|-------------------------------------|----------|------------------------------------------------------------------------------|---------------------------------------------------------------------|
| 1  | Ciénaga Grande de Santa Marta       | Colombia | Estuarine                                                                    | 0.77                                                                |
| 2  | Everglades                          | USA      | Freshwater wetland, coastal wetland                                          | 32                                                                  |
| 3  | Gatun Lake                          | Panama   | Chagres River, lake                                                          | 13                                                                  |
| 4  | León–Atrato                         | Colombia | Marshes and swamps                                                           | 17                                                                  |
| 5  | Mekong                              | Vietnam  | Marine                                                                       | 5                                                                   |
| 6  | Pantanal                            | Brazil   | Periodically inundated savanna                                               | 27                                                                  |
| 7  | Shadegan                            | Iran     | Palustrine, estuarine, marine                                                | 31                                                                  |
| 8  | Lake Urmia                          | Iran     | Lake                                                                         | 8.8                                                                 |
| 9  | Zone Humide de Souss                | Morocco  | Marine and coastal                                                           | 0.01                                                                |
| 10 | Anzali Mordab                       | Iran     | Inland and marine/coastal wetland                                            | 4                                                                   |
| 11 | Gialova Lagoon                      | Greece   | Coastal wetland                                                              | 13                                                                  |
| 12 | Geographically isolated wetlands    | USA      | Freshwater marshes and swamps                                                | 30                                                                  |
| 13 | Lagunas Plaza and Grande            | Colombia | Glacial lake                                                                 | 4.4                                                                 |
| 14 | Fúquene, Cucunubá y Palacio         | Colombia | Natural shallow lake                                                         | 1.7                                                                 |
| 15 | Lower Mississippi River Delta Plain | USA      | Riverine, marine, estuarine, Lacustrine                                      | 3.5                                                                 |
| 16 | Páramo Sumapaz                      | Colombia | High-altitude wetland                                                        | 46                                                                  |
| 17 | Sacca Di Goro                       | Italy    | Shallow saltwater coastal lagoon                                             | 4.2                                                                 |
| 18 | Simpevarp                           | Sweden   | Bogs, fens                                                                   | 0.01                                                                |
| 19 | Upper Lough Erne                    | Ireland  | Flood plain/shallow lakes                                                    | 22                                                                  |
| 20 | Forsmark                            | Sweden   | Bogs, fens, marshes, (shallow lakes)                                         | 0.01                                                                |
| 21 | Le Sueur                            | USA      | Isolated, fluvial/riparian, lakes/ponds, marshes, forest/shrubs, constructed | 5                                                                   |
| 22 | Norrström                           | Sweden   | Multiple                                                                     | 5                                                                   |
| 23 | Tavvavuoma                          | Sweden   | Peat plateau/thermokarst lake complex                                        | 2.8                                                                 |
| 24 | Volga                               | Russia   | Marshes (riverine, palustrine)                                               | 1                                                                   |
| 25 | Selenga                             | Russia   | Marshes (riverine, palustrine)                                               | 0.13                                                                |

147  
 148  
 149  
 150  
 151  
 152  
 153  
 154  
 155  
 156  
 157  
 158  
 159  
 160  
 161  
 162  
 163  
 164  
 165  
 166



167 **Table S2. Results of the Wilcoxon Rank Sum test at 95% confidence level.** Table showing resulting *p*-  
 168 values from the Wilcoxon Rank Sum test at 95 % confidence level between two sample periods (period 1  
 169 and period 2) for precipitation (*P*), temperature (*T*) and runoff (*R*) for each wetlandscape. Significant  
 170 results ( $p < 0.05$ ) are shown in bold.

| <i>ID</i> | <i>Wetlandscapes</i>                               | <i>p-value (P)</i> | <i>p-value (T)</i> | <i>p-value (R)</i> |
|-----------|----------------------------------------------------|--------------------|--------------------|--------------------|
| 1         | <i>Ciénaga Grande de Santa Marta</i>               | 0.232              | <b>0.038</b>       |                    |
| 2         | <i>Everglades</i>                                  | 0.149              | <b>0.013</b>       |                    |
| 3         | <i>Gatun Lake</i>                                  | 0.529              | <b>0.009</b>       |                    |
| 4         | <i>León-Atrato</i>                                 | 0.301              | <b>0.046</b>       |                    |
| 5         | <i>Mekong</i>                                      | 0.097              | <b>0.001</b>       |                    |
| 6         | <i>Pantanal</i>                                    | 0.478              | <b>0.000</b>       | <b>0.00004</b>     |
| 7         | <i>Shadegan</i>                                    | 0.820              | <b>0.000</b>       |                    |
| 8         | <i>Lake Urmia</i>                                  | <b>0.006</b>       | <b>0.000</b>       | 0.217              |
| 9         | <i>Zone Humide de Souss</i>                        | 0.989              | <b>0.000</b>       |                    |
| 10        | <i>Anzali Mordab</i>                               | 0.183              | <b>0.000</b>       | <b>0.020</b>       |
| 11        | <i>Gialova Lagoon</i>                              | 0.862              | <b>0.000</b>       |                    |
| 12        | <i>Geographically Isolated Wetlands of Florida</i> | 0.639              | <b>0.049</b>       | 0.221              |
| 13        | <i>Lagunas Plaza and Grande</i>                    | 0.583              | <b>0.002</b>       |                    |
| 14        | <i>Fúquene, Cucunúba Y Palacio</i>                 | 0.201              | <b>0.023</b>       |                    |
| 15        | <i>Lower Mississippi River Delta Plain</i>         | 0.968              | <b>0.043</b>       |                    |
| 16        | <i>Páramo Sumapaz</i>                              | 0.232              | <b>0.060</b>       | 0.463              |
| 17        | <i>Sacca Di goro</i>                               | 0.301              | <b>0.000</b>       |                    |
| 18        | <i>Simpevarp</i>                                   | 0.242              | <b>0.001</b>       |                    |
| 19        | <i>Upper Lough Erne</i>                            | 0.398              | <b>0.000</b>       |                    |
| 20        | <i>Forsmark</i>                                    | 0.718              | <b>0.001</b>       |                    |
| 21        | <i>Le Sueur</i>                                    | 0.947              | <b>0.043</b>       | 0.429              |
| 22        | <i>Norrström</i>                                   | 0.800              | <b>0.001</b>       | 0.883              |
| 23        | <i>Tavvavuoma</i>                                  | 0.091              | <b>0.002</b>       |                    |
| 24        | <i>Volga</i>                                       | 0.904              | <b>0.012</b>       | 0.091              |
| 25        | <i>Selenga</i>                                     | 0.149              | <b>0.002</b>       | 0.274              |
